# Supplementary material
Source: PubMed Central journal article supplement (PMC4346199)
Supplement: NIHMS60952-supplement-Supplementary_Information.pdf [file NIHMS60952-supplement-Supplementary_Information.pdf]

## SUPPLEMENTARY DATA

### **Bilirubin as a potential causal factor in type 2 diabetes risk: a Mendelian randomization study**

Ali Abbasi MD,PhD<sup>1,2,3</sup>; Petronella E. Deetman BSc<sup>2</sup>; Eva Corpeleijn PhD<sup>1</sup>; Ron T. Gansevoort MD,PhD<sup>2</sup>; Rijk O.B. Gans MD,PhD<sup>2</sup>; Hans L. Hillege MD,PhD<sup>1</sup>; Pim van der Harst MD,PhD<sup>4,5,6</sup>; Ronald P. Stolk MD, PhD<sup>1</sup>; Gerjan Navis MD,PhD<sup>2</sup>; Behrooz Z. Alizadeh MD,PhD<sup>1</sup>; Stephan J.L. Bakker MD,PhD<sup>2</sup>

1 University of Groningen, University Medical Center Groningen, Department of Epidemiology, Groningen, the Netherlands

2 University of Groningen, University Medical Center Groningen, Department of Internal Medicine, Groningen, the Netherlands

3 MRC Epidemiology Unit, University of Cambridge School of Clinical Medicine, Institute of Metabolic Science, Cambridge Biomedical Campus, Addenbrooke's Hospital, Cambridge, UK

4 University of Groningen, University Medical Center Groningen, Department of Cardiology, Groningen, the Netherlands

5 University of Groningen, University Medical Center Groningen, Department of Genetics, Groningen, The Netherlands

6 Durrer Center for Cardiogenetic Research, ICIN-Netherlands Heart Institute, Utrecht, The Netherlands

**Short title:** Bilirubin and type 2 diabetes

SUPPLEMENTARY DATA

**Supplementary Table 1. Measurement of markers**

| <b>Marker</b>                        | <b>Assay</b>                                                                                   |
|--------------------------------------|------------------------------------------------------------------------------------------------|
| Total cholesterol                    | Dry chemistry (Eastman Kodak, Rochester, New York)                                             |
| Glucose                              | Dry chemistry (Eastman Kodak, Rochester, New York)                                             |
| High density lipoprotein cholesterol | Homogeneous method (direct HDL, Aeroset TM System, Abbott Laboratories, Abbott Park, Illinois) |
| Triglycerides                        | Enzymatically                                                                                  |
| High-sensitivity C-reactive protein  | Nephelometry (BN II, Dade Behring, Marburg, Germany)                                           |
| Urinary albumin concentration        | Nephelometry (Dade Behring Diagnostic, Marburg, Germany)                                       |
| Gamma-glutamyltransferase            | Standardized enzymatic method (Modular P; Roche Diagnostics, Indianapolis, IN)                 |
| Alanine aminotransferase             | Standardized enzymatic method (Modular P; Roche Diagnostics, Indianapolis, IN)                 |
| Aspartate aminotransferase           | Standardized enzymatic method (Modular P; Roche Diagnostics, Indianapolis, IN)                 |
| Alkaline phosphatase                 | Standardized enzymatic method (Modular P; Roche Diagnostics, Indianapolis, IN)                 |
| Albumin                              | Standardized enzymatic method (Modular P; Roche Diagnostics, Indianapolis, IN)                 |

SUPPLEMENTARY DATA

**Supplementary Table 2. Association of individual SNPs with bilirubin, type 2 diabetes and glycemic traits in genome-wide association study summary statistics**

| SNP        |                 |         | Association with Bilirubin* |                      | Association with T2D or glycemic traits† |      |                   |      |                   |      |                   |      |
|------------|-----------------|---------|-----------------------------|----------------------|------------------------------------------|------|-------------------|------|-------------------|------|-------------------|------|
|            |                 |         | Effect (SE)                 | P                    | T2D                                      |      | Glucose           |      | Insulin           |      | HOMA-IR           |      |
|            | Gene            | Alleles | Effect (SE)                 | P                    | Effect (SE)                              | P    | Effect (SE)       | P    | Effect (SE)       | P    | Effect (SE)       | P    |
| rs6742078  | <i>UGT1A1</i>   | T/G     | 0.23<br>(0.01)              | $5 \times 10^{-324}$ | 0.030<br>(0.020)                         | 0.1  | -0.009<br>(0.004) | 0.02 | -0.009<br>(0.004) | 0.03 | -0.009<br>(0.004) | 0.03 |
| rs4149056  | <i>SLCO1B1</i>  | C/T     | 0.05<br>(0.01)              | $1 \times 10^{-13}$  | -0.020<br>(0.022)                        | 0.31 | 0.0003<br>(0.005) | 0.94 | 0.006<br>(0.005)  | 0.25 | 0.004<br>(0.005)  | 0.47 |
| rs16928809 | <i>SLC22A18</i> | A/G     | 0.06<br>(0.01)              | $1 \times 10^{-7}$   | -0.049<br>(0.03)                         | 0.13 | -0.003<br>(0.007) | 0.67 | -0.002<br>(0.007) | 0.76 | -0.004<br>(0.008) | 0.63 |

\*The estimated SNP effects for serum total bilirubin levels (umol/L increase in log-transformed levels) were obtained from GWA meta-analysis among up to 9,464 individuals, Johnson et al. (17). The *UGT1A1* SNP, rs6742078, explained 16.7-18.1% of the total variance in bilirubin levels as reported in Johnson et al. (17). Two other SNPs, rs4149056 and rs16928809, explained less than 1% (e.g, the *SLCO1B1* SNP, rs4149056:0.5-0.6%) of the total variance in bilirubin levels. †The estimated SNP effects for T2D and glycemic traits were obtained from the DIGRAM consortium (among up to 12,171 case subjects and 56,862 controls), Morris et al. (45), and MAGIC (among up to 46,186 individuals), Dupuis et al. (27), respectively.
